# Supplementary material for: Next-Generation Sequencing Improves Diagnosis, Prognosis and Clinical Management of Myeloid Neoplasms
Source: MDPI journal article supplement (doi:10.3390/cancers11091364), 2019-09-13
Supplement: s1 [file s1]

# Supplementary Materials: Next-generation sequencing improves diagnosis, prognosis and clinical management of myeloid neoplasms.

Diego Carbonell, Julia Suárez-González, María Chicano, Cristina Andrés-Zayas, Juan Carlos Triviño, Gabriela Rodríguez-Macías, Mariana Bastos-Oreiro, Patricia Font, Mónica Ballesteros, Paula Muñiz, Pascual Balsalobre, Mi Kwon, Javier Anguita, José Luis Díez-Martín, Ismael Buño, Carolina Martínez-Laperche.

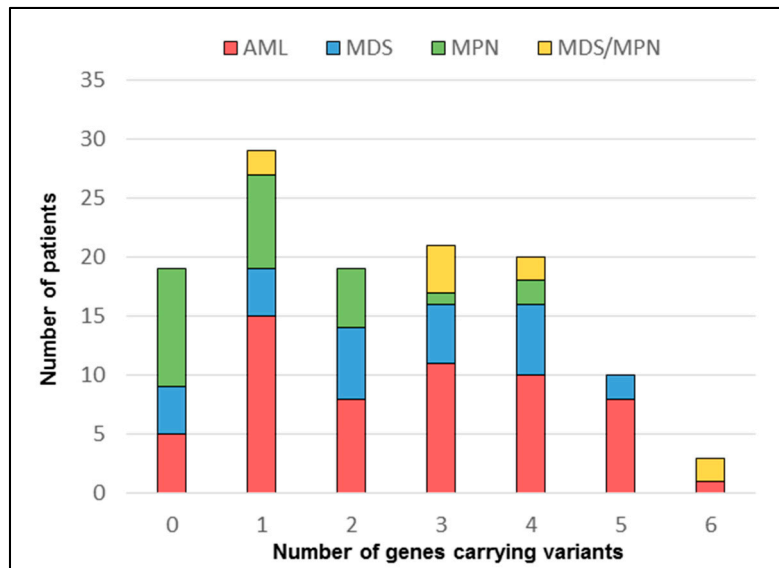

**Figure S1.** Number of variants per patient with myeloid neoplasms (n = 121). AML: acute myeloid leukemia. MPN: myeloproliferative neoplasm. MDS: myelodysplastic syndrome. MDS/MPN: myelodysplastic syndrome/myeloproliferative neoplasm.

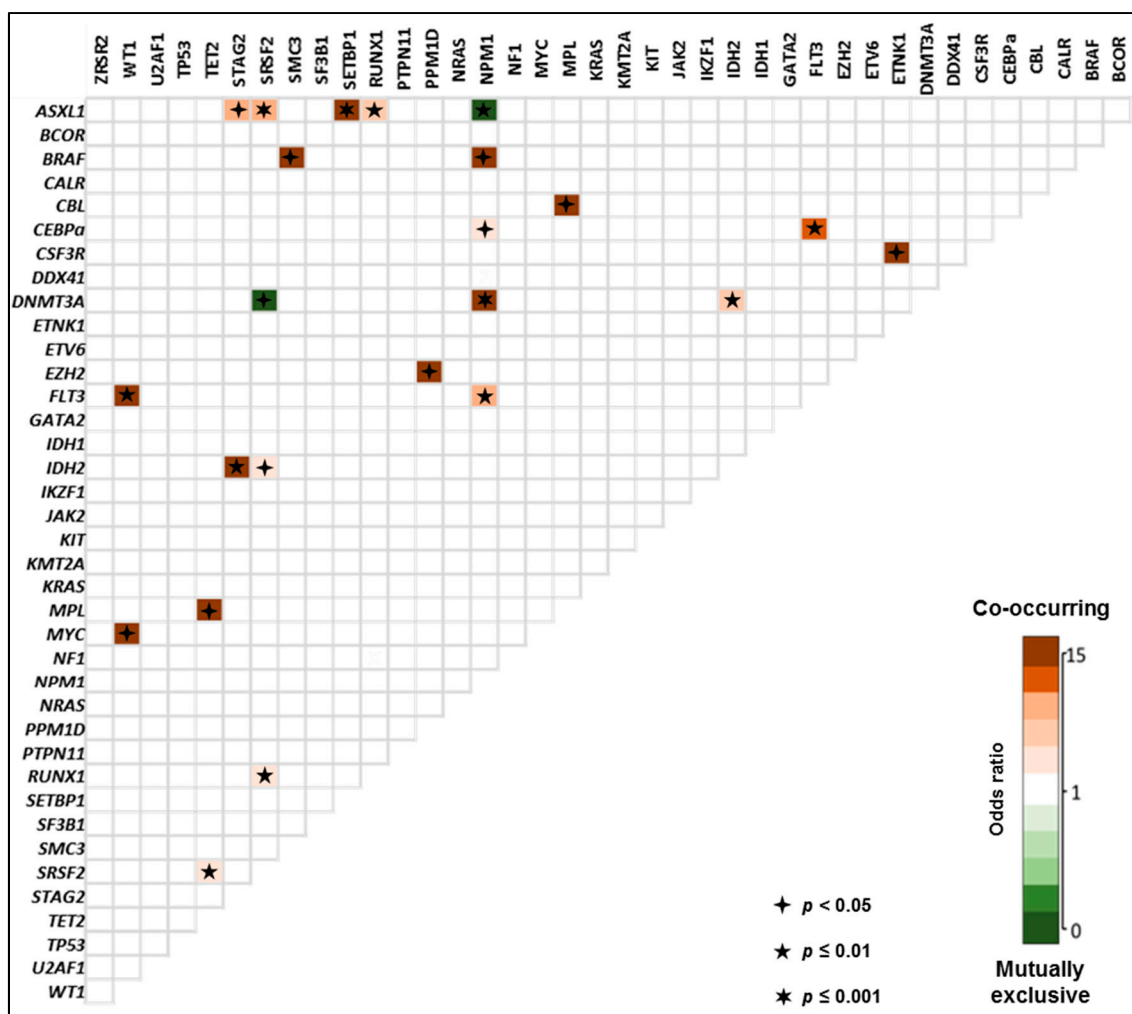

Figure S2. Pairwise associations between mutated genes.

| NGS myeloid panel A and B genes |        |       |        |        |       |
|---------------------------------|--------|-------|--------|--------|-------|
| ABL1                            | CNOT3  | FLT3  | KRAS   | PPM1D  | SRSF2 |
| ANKRD26                         | CREBBP | GATA2 | MAP1B  | PTPN11 | STAG1 |
| ASXL1                           | CSF3R  | GNAS  | MPL    | RUNX1  | STAG2 |
| BCOR                            | DDX41  | IDH1  | MYD88  | SETBP1 | TET2  |
| BCORL1                          | DNMT3A | IDH2  | NF1    | SETD2  | TP53  |
| BRAF                            | EPOR   | IKZF1 | NOTCH1 | SETDB1 | U2AF1 |
| CALR                            | ETNK1  | JAK2  | NPM1   | SF3B1  | VHL   |
| CBL                             | ETV6   | KIT   | NRAS   | SMC3   | WT1   |
| CEBPA                           | EZH2   | KMT2A | PHF6   | SOS1   | ZRSR2 |

Figure S3. Genes included in NGS panels A and B. Blue, panel A exclusive genes; red, panel B exclusive genes; white, genes included in both panels. Germline predisposition genes are underlined. Panel A: indels and single-nucleotide variants (LMA-GeneSGKit; Sistemas Genómicos, Spain); panel B: indels, single-nucleotide variants, translocations, copy number variants (CNVs) and large numerical alterations (MyeloidNeoplasm-GeneSGKit; Sistemas Genómicos, Spain).

**Table S1A. Pathogenic/likely pathogenic variants.**

| Gene   | Variant                               | VAF   | PN     |
|--------|---------------------------------------|-------|--------|
| ASXL1  | c.1609G>T                             | 0.43  | 76     |
| ASXL1  | c.1772dupA                            | 0.494 | 116    |
| ASXL1  | c.1774C>T                             | 0.153 | 60     |
| ASXL1  | c.1782C>A                             | 0.391 | 48     |
| ASXL1  | c.1900_1922delAGAGAGGCGGCCACCACTGCCAT | 0.215 | 25     |
| ASXL1  | c.1900_1922delAGAGAGGCGGCCACCACTGCCAT | 0.172 | 56     |
| ASXL1  | c.1900_1922delAGAGAGGCGGCCACCACTGCCAT | 0.239 | 86     |
| ASXL1  | c.1900_1922delAGAGAGGCGGCCACCACTGCCAT | 0.149 | 92     |
| ASXL1  | c.1900_1922delAGAGAGGCGGCCACCACTGCCAT | 0.355 | 103    |
| ASXL1  | c.1926dupA                            | 0.424 | 73     |
| ASXL1  | c.1934delG                            | 0.443 | 11     |
| ASXL1  | c.1934delG                            | 0.039 | 15     |
| ASXL1  | c.1934dupG                            | 0.174 | 16     |
| ASXL1  | c.1934dupG                            | 0.373 | 33     |
| ASXL1  | c.1934dupG                            | 0.407 | 44     |
| ASXL1  | c.1934dupG                            | 0.361 | 47     |
| ASXL1  | c.1934dupG                            | 0.296 | 63     |
| ASXL1  | c.1934dupG                            | 0.473 | 64     |
| ASXL1  | c.1934dupG                            | 0.455 | 75     |
| ASXL1  | c.1934dupG                            | 0.154 | 82     |
| ASXL1  | c.1934dupG                            | 0.394 | 83     |
| ASXL1  | c.1934dupG                            | 0.433 | 95     |
| ASXL1  | c.1934dupG                            | 0.408 | 109    |
| ASXL1  | c.1934dupG                            | 0.379 | 111    |
| ASXL1  | c.1934dupG                            | 0.404 | 114    |
| ASXL1  | c.1934dupG                            | 0.448 | 117    |
| ASXL1  | c.1934dupG                            | 0.37  | 118    |
| ASXL1  | c.2077C>T                             | 0.401 | 78     |
| ASXL1  | c.2309C>G                             | 0.438 | 43     |
| ASXL1  | c.2324delT                            | 0.127 | 98     |
| ASXL1  | c.2351delA                            | 0.453 | 69     |
| ASXL1  | c.2455G>T                             | 0.494 | 102    |
| ASXL1  | c.2734A>T                             | 0.399 | 7      |
| ASXL1  | c.2898_2900delAGG                     | 0.489 | 94     |
| BCOR   | c.2330dupC                            | 0.057 | 15     |
| BRAF   | c.1799T>A                             | 0.338 | 50     |
| BRAF   | c.1802A>C                             | 0.444 | 34     |
| CALR   | c.1092_1143del                        | 0.1   | 58     |
| CALR   | c.1092_1143del                        | 0.1   | 85     |
| CALR   | c.1127_1135GCAAGAGG>TTTGCTTA          | 0.301 | 104    |
| CALR   | c.1135_1144delGAGGAGGAGG              | 0.366 | 76     |
| CALR   | c.1154_1155insTTGTC                   | 0.384 | 49     |
| CBL    | c.1258C>T                             | 0.257 | 86     |
| CBL    | c.1259G>A                             | 0.924 | 100    |
| CEBPa  | c.178delA                             | 0.496 | 6      |
| CEBPa  | c.198_201dupCTAC                      | 0.772 | 26     |
| CEBPa  | c.247delC                             | 0.418 | 1      |
| CEBPa  | c.383delC                             | 0.426 | 70     |
| CEBPa  | c.59_60insTC                          | 0.478 | 72     |
| CEBPa  | c.622T>C                              | 0.5   | 13 †   |
| CEBPa  | c.659T>C                              | 0.5   | 13 †   |
| CEBPa  | c.68dupC                              | 0.45  | 19     |
| CEBPa  | c.934_936dupCAG                       | 0.49  | 112    |
| CEBPa  | c.944_945insCAC                       | 0.392 | 1 *    |
| CEBPa  | c.971T>G                              | 0.471 | 112    |
| CSF3R  | c.2326C>T                             | 0.149 | 63     |
| DDX41  | c.931C>T                              | 0.517 | 51     |
| DNMT3A | c.1031T>C                             | 0.65  | 15 * † |
| DNMT3A | c.1627G>A                             | 0.375 | 34 *   |
| DNMT3A | c.1700_1702delTGG                     | 0.168 | 77 *   |
| DNMT3A | c.1733A>G                             | 0.371 | 71     |
| DNMT3A | c.1913C>T                             | 0.227 | 13 * † |
| DNMT3A | c.1920delT                            | 0.436 | 11     |
| DNMT3A | c.2320G>A                             | 0.453 | 11 * † |
| DNMT3A | c.2548G>T                             | 0.361 | 4      |
| DNMT3A | c.2578T>C                             | 0.411 | 89     |
| DNMT3A | c.2644C>T                             | 0.429 | 28     |
| DNMT3A | c.2644C>T                             | 0.456 | 57     |
| DNMT3A | c.2644C>T                             | 0.426 | 70     |
| DNMT3A | c.2645G>A                             | 0.465 | 10     |

Table S1A (Cont'd)

| Gene   | Variant            | VAF   | PN     |
|--------|--------------------|-------|--------|
| DNMT3A | c.2645G>A          | 0.418 | 18     |
| DNMT3A | c.2645G>A          | 0.499 | 27     |
| DNMT3A | c.2645G>A          | 0.249 | 35     |
| DNMT3A | c.2645G>A          | 0.445 | 66     |
| DNMT3A | c.2645G>A          | 0.461 | 72     |
| DNMT3A | c.2645G>A          | 0.407 | 73     |
| DNMT3A | c.2705T>C          | 0.416 | 100    |
| DNMT3A | c.939G>A           | 0.466 | 59     |
| DNMT3A | c.990G>A           | 0.396 | 4      |
| ETNK1  | c.734G>T           | 0.247 | 63 *   |
| ETV6   | c.306dupT          | 0.476 | 117    |
| ETV6   | c.416_419delCTAT   | 0.077 | 103    |
| EZH2   | c.1399delA         | 0.698 | 48     |
| EZH2   | c.2023A>T          | 0.433 | 6 * †  |
| EZH2   | c.863G>A           | 0.41  | 86 *   |
| EZH2   | c.893G>A           | 0.67  | 118 *  |
| FLT3   | c.2503G>T          | 0.451 | 10     |
| FLT3   | c.2503G>T          | 0.341 | 29     |
| FLT3   | ITD                | 0.46  | 6      |
| FLT3   | ITD                | 0.129 | 19     |
| FLT3   | ITD                | 0.26  | 22     |
| FLT3   | ITD                | 0.27  | 27     |
| FLT3   | ITD                | 0.46  | 36     |
| FLT3   | ITD                | 0.211 | 72     |
| GATA2  | c.1186C>T          | 0.491 | 17     |
| GATA2  | c.1187G>A          | 0.565 | 55     |
| GATA2  | c.913C>G           | 0.433 | 24 * † |
| GATA2  | c.989G>A           | 0.412 | 112    |
| IDH1   | c.394C>G           | 0.299 | 107    |
| IDH1   | c.394C>T           | 0.221 | 13     |
| IDH1   | c.394C>T           | 0.235 | 35     |
| IDH1   | c.394C>T           | 0.209 | 56     |
| IDH1   | c.394C>T           | 0.195 | 109    |
| IDH1   | c.395G>A           | 0.506 | 70     |
| IDH2   | c.419G>A           | 0.452 | 7      |
| IDH2   | c.419G>A           | 0.472 | 14     |
| IDH2   | c.419G>A           | 0.322 | 15     |
| IDH2   | c.419G>A           | 0.434 | 38     |
| IDH2   | c.419G>A           | 0.363 | 54     |
| IDH2   | c.419G>A           | 0.471 | 59     |
| IDH2   | c.515G>A           | 0.373 | 4      |
| IDH2   | c.515G>A           | 0.469 | 11     |
| IDH2   | c.515G>A           | 0.451 | 28     |
| IKZF1  | c.647_648delTA     | 0.101 | 89     |
| JAK2   | c.1615A>T          | 0.428 | 53     |
| JAK2   | c.1849G>T          | 0.483 | 3      |
| JAK2   | c.1849G>T          | 0.183 | 37     |
| JAK2   | c.1849G>T          | 0.135 | 56     |
| JAK2   | c.1849G>T          | 0.211 | 63     |
| JAK2   | c.1849G>T          | 0.451 | 64     |
| JAK2   | c.1849G>T          | 0.971 | 68     |
| JAK2   | c.1849G>T          | 0.118 | 69     |
| JAK2   | c.1849G>T          | 0.243 | 75     |
| JAK2   | c.1849G>T          | 0.156 | 77     |
| JAK2   | c.1849G>T          | 0.089 | 88     |
| JAK2   | c.1849G>T          | 0.477 | 93     |
| JAK2   | c.1849G>T          | 0.137 | 113    |
| KIT    | c.2447A>T          | 0.471 | 83     |
| KMT2A  | c.1A>G             | 0.385 | 39     |
| KRAS   | c.34G>A            | 0.154 | 58     |
| KRAS   | c.35G>T            | 0.154 | 14     |
| KRAS   | c.38G>A            | 0.24  | 18     |
| MPL    | c.1771T>G          | 0.324 | 24     |
| MPL    | c.1771T>G          | 0.156 | 100    |
| MYC    | c.221C>T           | 0.274 | 71     |
| NF1    | c.1621_1624dupATTG | 0.169 | 40     |
| NF1    | c.910C>T           | 0.451 | 64     |
| NPM1   | c.860_863dupTCTG   | 0.47  | 6      |
| NPM1   | c.860_863dupTCTG   | 0.328 | 18     |
| NPM1   | c.860_863dupTCTG   | 0.421 | 27     |

Table S1A (Cont'd)

| Gene          | Variant                              | VAF   | PN     |
|---------------|--------------------------------------|-------|--------|
| <i>NPM1</i>   | c.860_863dupTCTG                     | 0.386 | 34     |
| <i>NPM1</i>   | c.860_863dupTCTG                     | 0.453 | 35     |
| <i>NPM1</i>   | c.860_863dupTCTG                     | 0.436 | 39     |
| <i>NPM1</i>   | c.860_863dupTCTG                     | 0.297 | 50     |
| <i>NPM1</i>   | c.860_863dupTCTG                     | 0.323 | 57     |
| <i>NPM1</i>   | c.860_863dupTCTG                     | 0.2   | 59     |
| <i>NPM1</i>   | c.860_863dupTCTG                     | 0.282 | 70     |
| <i>NPM1</i>   | c.860_863dupTCTG                     | 0.211 | 100    |
| <i>NPM1</i>   | c.863_864insCATG                     | 0.308 | 71     |
| <i>NPM1</i>   | c.863_864insCATG                     | 0.397 | 72     |
| <i>NPM1</i>   | c.863_864insCCTG                     | 0.391 | 10     |
| <i>NRAS</i>   | c.181C>A                             | 0.378 | 20     |
| <i>NRAS</i>   | c.182A>G                             | 0.446 | 41     |
| <i>NRAS</i>   | c.34G>A                              | 0.403 | 43     |
| <i>NRAS</i>   | c.34G>A                              | 0.132 | 119    |
| <i>NRAS</i>   | c.34G>T                              | 0.323 | 70     |
| <i>NRAS</i>   | c.35G>A                              | 0.124 | 82     |
| <i>NRAS</i>   | c.35G>A                              | 0.102 | 94     |
| <i>NRAS</i>   | c.35G>T                              | 0.282 | 34     |
| <i>NRAS</i>   | c.38G>A                              | 0.326 | 12     |
| <i>NRAS</i>   | c.38G>A                              | 0.158 | 95     |
| <i>NRAS</i>   | c.38G>T                              | 0.348 | 71     |
| <i>PPM1D</i>  | c.1636dupC                           | 0.304 | 48     |
| <i>PTPN11</i> | c.179G>T                             | 0.139 | 2      |
| <i>RUNX1</i>  | c.305dupT                            | 0.527 | 109    |
| <i>RUNX1</i>  | c.335dupT                            | 0.074 | 89     |
| <i>RUNX1</i>  | c.367_370dupGATG                     | 0.307 | 14     |
| <i>RUNX1</i>  | c.530_532delTCA                      | 0.209 | 82 *   |
| <i>RUNX1</i>  | c.592G>A                             | 0.363 | 8      |
| <i>RUNX1</i>  | c.595G>A                             | 0.219 | 73     |
| <i>RUNX1</i>  | c.602G>A                             | 0.379 | 95     |
| <i>RUNX1</i>  | c.611G>A                             | 0.221 | 7      |
| <i>RUNX1</i>  | c.926dupG                            | 0.119 | 16     |
| <i>RUNX1</i>  | c.941_942delCT                       | 0.229 | 48     |
| <i>RUNX1</i>  | c.941_942delCT                       | 0.136 | 105    |
| <i>RUNX1</i>  | c.958C>T                             | 0.421 | 116    |
| <i>SETBP1</i> | c.2602G>A                            | 0.462 | 43     |
| <i>SETBP1</i> | c.2602G>A                            | 0.175 | 98     |
| <i>SETBP1</i> | c.2602G>A                            | 0.189 | 103    |
| <i>SETBP1</i> | c.2602G>A                            | 0.24  | 118    |
| <i>SETBP1</i> | c.2602G>T                            | 0.493 | 111    |
| <i>SETBP1</i> | c.2608G>A                            | 0.437 | 47     |
| <i>SETBP1</i> | c.2609G>T                            | 0.346 | 60     |
| <i>SETBP1</i> | c.2620G>A                            | 0.487 | 75     |
| <i>SF3B1</i>  | c.1997A>C                            | 0.498 | 94     |
| <i>SF3B1</i>  | c.1997A>G                            | 0.481 | 57     |
| <i>SF3B1</i>  | c.1998G>C                            | 0.504 | 111    |
| <i>SF3B1</i>  | c.2098A>G                            | 0.419 | 89     |
| <i>SF3B1</i>  | c.2098A>G                            | 0.196 | 90     |
| <i>SMC3</i>   | c.1973T>G                            | 0.354 | 50 * † |
| <i>SRSF2</i>  | c.281_283dupGCC                      | 0.469 | 116    |
| <i>SRSF2</i>  | c.284_307delCCCCGGACTCACACCACAGCCGCC | 0.224 | 24     |
| <i>SRSF2</i>  | c.284_307delCCCCGGACTCACACCACAGCCGCC | 0.219 | 54     |
| <i>SRSF2</i>  | c.284C>A                             | 0.481 | 14     |
| <i>SRSF2</i>  | c.284C>A                             | 0.419 | 25     |
| <i>SRSF2</i>  | c.284C>A                             | 0.36  | 38     |
| <i>SRSF2</i>  | c.284C>A                             | 0.47  | 44     |
| <i>SRSF2</i>  | c.284C>A                             | 0.453 | 47     |
| <i>SRSF2</i>  | c.284C>A                             | 0.242 | 56     |
| <i>SRSF2</i>  | c.284C>A                             | 0.451 | 59     |
| <i>SRSF2</i>  | c.284C>A                             | 0.497 | 64     |
| <i>SRSF2</i>  | c.284C>A                             | 0.519 | 75     |
| <i>SRSF2</i>  | c.284C>A                             | 0.504 | 76     |
| <i>SRSF2</i>  | c.284C>A                             | 0.414 | 80     |
| <i>SRSF2</i>  | c.284C>A                             | 0.507 | 95     |
| <i>SRSF2</i>  | c.284C>A                             | 0.449 | 102    |
| <i>SRSF2</i>  | c.284C>A                             | 0.415 | 103    |
| <i>SRSF2</i>  | c.284C>A                             | 0.364 | 109    |
| <i>SRSF2</i>  | c.284C>A                             | 0.457 | 114    |
| <i>SRSF2</i>  | c.284C>G                             | 0.222 | 16     |

Table S1A (Cont'd)

| Gene  | Variant                         | VAF   | PN  |
|-------|---------------------------------|-------|-----|
| SRSF2 | c.284C>G                        | 0.476 | 79  |
| SRSF2 | c.284C>T                        | 0.399 | 7   |
| SRSF2 | c.284C>T                        | 0.454 | 39  |
| SRSF2 | c.284C>T                        | 0.468 | 43  |
| SRSF2 | c.284C>T                        | 0.473 | 78  |
| SRSF2 | c.284C>T                        | 0.348 | 82  |
| SRSF2 | c.284C>T                        | 0.428 | 94  |
| SRSF2 | c.284C>T                        | 0.255 | 106 |
| STAG2 | c.1536A>T                       | 0.2   | 28  |
| STAG2 | c.1876dupA                      | 0.11  | 25  |
| STAG2 | c.2536_2552delGGTCAGCAAGAGGATGA | 0.373 | 25  |
| STAG2 | c.2562_2563insC                 | 0.31  | 7   |
| STAG2 | c.913C>T                        | 0.298 | 15  |
| TET2  | c.1803delC                      | 0.491 | 79  |
| TET2  | c.1810C>T                       | 0.51  | 100 |
| TET2  | c.1852C>T                       | 0.344 | 24  |
| TET2  | c.1918C>T                       | 0.315 | 92  |
| TET2  | c.2148dupA                      | 0.493 | 72  |
| TET2  | c.2255_2261delATAAAGA           | 0.434 | 100 |
| TET2  | c.2311A>T                       | 0.326 | 16  |
| TET2  | c.2382_2385delAAGC              | 0.431 | 106 |
| TET2  | c.2725C>T                       | 0.454 | 92  |
| TET2  | c.2848_2849delGC                | 0.491 | 39  |
| TET2  | c.2905delC                      | 0.441 | 102 |
| TET2  | c.2926C>T                       | 0.341 | 67  |
| TET2  | c.2937delG                      | 0.175 | 67  |
| TET2  | c.322C>T                        | 0.387 | 48  |
| TET2  | c.3308delA                      | 0.529 | 78  |
| TET2  | c.3365delC                      | 0.387 | 102 |
| TET2  | c.3457G>A                       | 0.188 | 61  |
| TET2  | c.3575delG                      | 0.266 | 82  |
| TET2  | c.3782G>A                       | 0.467 | 64  |
| TET2  | c.3811delT                      | 0.268 | 89  |
| TET2  | c.3893delG                      | 0.392 | 80  |
| TET2  | c.3922A>T                       | 0.429 | 69  |
| TET2  | c.3965T>C                       | 0.419 | 6   |
| TET2  | c.4075C>T                       | 0.41  | 79  |
| TET2  | c.4393C>T                       | 0.238 | 61  |
| TET2  | c.4662dupA                      | 0.202 | 106 |
| TET2  | c.5029dupA                      | 0.465 | 39  |
| TET2  | c.5081T>G                       | 0.301 | 106 |
| TET2  | c.521delC                       | 0.476 | 64  |
| TET2  | c.551_555delAGCAG               | 0.13  | 48  |
| TET2  | c.5541G>A                       | 0.457 | 78  |
| TET2  | c.5650A>G                       | 0.375 | 18  |
| TET2  | c.5650A>G                       | 0.712 | 53  |
| TET2  | c.5686A>G                       | 0.448 | 99  |
| TP53  | c.1129A>C                       | 0.163 | 110 |
| TP53  | c.1129A>C                       | 0.207 | 113 |
| TP53  | c.376-2A>G                      | 0.318 | 9   |
| TP53  | c.376-8_384delTCCTACAGTACTCCCCT | 0.122 | 90  |
| TP53  | c.427G>A                        | 0.3   | 108 |
| TP53  | c.451C>T                        | 0.806 | 84  |
| TP53  | c.470dupT                       | 0.408 | 121 |
| TP53  | c.536A>G                        | 0.321 | 42  |
| TP53  | c.615T>A                        | 0.304 | 108 |
| TP53  | c.701A>C                        | 0.091 | 97  |
| TP53  | c.743G>A                        | 0.12  | 110 |
| TP53  | c.824G>A                        | 0.17  | 105 |
| TP53  | c.830G>A                        | 0.344 | 103 |
| TP53  | c.844C>T                        | 0.893 | 40  |
| U2AF1 | c.470A>G                        | 0.376 | 60  |
| WT1   | c.1137_1138insG                 | 0.492 | 22  |
| WT1   | c.1137dupA                      | 0.467 | 22  |
| WT1   | c.1141_1144dupTCGG              | 0.139 | 19  |
| WT1   | c.1397delT                      | 0.231 | 71  |
| ZRSR2 | c.1207delA                      | 0.222 | 73  |
| ZRSR2 | c.66delG                        | 0.34  | 61  |

**Table S1A.** Pathogenic variants. Variants of uncertain significance reclassified as pathogenic by the custom onco-hematology score are highlighted in yellow. PN: patient number. ITD: internal tandem duplication. Onco-hematology score critical feature: \* Remission sample. † VAF value.

Table S1B Variants of uncertain significance

| Gene           | Variant           | VAF   | PN  |
|----------------|-------------------|-------|-----|
| <i>ABL1</i>    | c.1823G>A         | 0.467 | 24  |
| <i>ABL1</i>    | c.2066A>G         | 0.544 | 120 |
| <i>ANKRD26</i> | c.3169G>A         | 0.501 | 114 |
| <i>ANKRD26</i> | c.371A>T          | 0.502 | 109 |
| <i>ANKRD26</i> | c.4145T>A         | 0.464 | 70  |
| <i>ANKRD26</i> | c.4259G>A         | 0.453 | 119 |
| <i>ANKRD26</i> | c.4924A>G         | 0.5   | 117 |
| <i>ANKRD26</i> | c.542C>T          | 0.46  | 97  |
| <i>ASXL1</i>   | c.2898_2900delAGG | 0.467 | 79  |
| <i>ASXL1</i>   | c.2911A>C         | 0.453 | 31  |
| <i>ASXL1</i>   | c.3306G>T         | 0.499 | 6   |
| <i>ASXL1</i>   | c.3306G>T         | 0.481 | 22  |
| <i>ASXL1</i>   | c.3449G>T         | 0.474 | 30  |
| <i>ASXL1</i>   | c.3745A>G         | 0.488 | 72  |
| <i>ASXL1</i>   | c.4189G>A         | 0.511 | 72  |
| <i>ASXL1</i>   | c.4493C>T         | 0.496 | 56  |
| <i>BCORL1</i>  | c.3108C>T         | 0.468 | 8   |
| <i>BCORL1</i>  | c.3302G>A         | 0.357 | 49  |
| <i>BRAF</i>    | c.1150A>G         | 0.442 | 20  |
| <i>CEBPa</i>   | c.296G>C          | 0.125 | 73  |
| <i>CNOT3</i>   | c.1136C>G         | 0.512 | 15  |
| <i>CNOT3</i>   | c.1277C>T         | 0.494 | 60  |
| <i>CNOT3</i>   | c.1528G>A         | 0.446 | 40  |
| <i>CREBBP</i>  | c.6077T>A         | 0.469 | 8   |
| <i>CREBBP</i>  | c.6624A>C         | 0.491 | 52  |
| <i>CSF3R</i>   | c.2153C>T         | 0.494 | 64  |
| <i>CSF3R</i>   | c.2153C>T         | 0.454 | 109 |
| <i>CSF3R</i>   | c.2197C>A         | 0.47  | 29  |
| <i>CSF3R</i>   | c.2405C>T         | 0.494 | 9   |
| <i>CSF3R</i>   | c.2422G>A         | 0.498 | 6   |
| <i>CSF3R</i>   | c.2422G>A         | 0.542 | 32  |
| <i>CSF3R</i>   | c.2503G>A         | 0.557 | 62  |
| <i>CSF3R</i>   | c.2503G>A         | 0.543 | 73  |
| <i>CSF3R</i>   | c.2503G>A         | 0.466 | 85  |
| <i>DDX41</i>   | c.1574G>A         | 0.114 | 97  |
| <i>DDX41</i>   | c.305A>G          | 0.485 | 112 |
| <i>DDX41</i>   | c.992_994delAGA   | 0.5   | 63  |
| <i>EPOR</i>    | c.137G>A          | 0.535 | 110 |
| <i>EPOR</i>    | c.296C>T          | 0.559 | 54  |
| <i>EPOR</i>    | c.368G>A          | 0.477 | 101 |
| <i>EPOR</i>    | c.971C>T          | 0.504 | 118 |
| <i>ETV6</i>    | c.1169C>T         | 0.222 | 66  |
| <i>ETV6</i>    | c.985G>A          | 0.448 | 107 |
| <i>EZH2</i>    | c.165C>G          | 0.445 | 57  |
| <i>FLT3</i>    | c.2440G>A         | 0.466 | 50  |
| <i>GNAS</i>    | c.1343A>C         | 0.156 | 61  |
| <i>KMT2A</i>   | c.10318A>G        | 0.367 | 40  |
| <i>KMT2A</i>   | c.10318A>G        | 0.501 | 66  |

Table S1B (Cont'd)

| Gene   | Variant           | VAF   | PN  |
|--------|-------------------|-------|-----|
| KMT2A  | c.10318A>G        | 0.437 | 97  |
| KMT2A  | c.1504G>A         | 0.396 | 86  |
| KMT2A  | c.1504G>A         | 0.495 | 87  |
| KMT2A  | c.3907C>G         | 0.496 | 69  |
| KMT2A  | c.3974G>A         | 0.503 | 39  |
| KMT2A  | c.6572G>A         | 0.478 | 21  |
| KMT2A  | c.6572G>A         | 0.417 | 32  |
| KMT2A  | c.6572G>A         | 0.48  | 67  |
| KRAS   | c.535G>A          | 0.35  | 71  |
| KRAS   | c.565A>C          | 0.446 | 92  |
| KRAS   | c.-9C>T           | 0.439 | 67  |
| MAP1B  | c.2768T>C         | 0.493 | 5   |
| MAP1B  | c.6077T>A         | 0.491 | 21  |
| MPL    | c.313T>C          | 0.522 | 81  |
| MYD88  | c.686T>C          | 0.486 | 60  |
| NF1    | c.1870T>C         | 0.521 | 48  |
| NF1    | c.4381A>T         | 0.224 | 75  |
| NF1    | c.528T>A          | 0.455 | 77  |
| NOTCH1 | c.1750G>A         | 0.481 | 12  |
| NOTCH1 | c.2734C>T         | 0.517 | 10  |
| NOTCH1 | c.4028C>T         | 0.5   | 4   |
| NOTCH1 | c.4865G>A         | 0.509 | 5   |
| NOTCH1 | c.5189C>T         | 0.523 | 33  |
| NOTCH1 | c.701G>A          | 0.488 | 53  |
| PHF6   | c.59G>A           | 0.364 | 49  |
| RUNX1  | c.493G>A          | 0.491 | 102 |
| RUNX1  | c.560C>T          | 0.508 | 32  |
| SETBP1 | c.1540C>G         | 0.48  | 112 |
| SETBP1 | c.3299A>G         | 0.493 | 69  |
| SETBP1 | c.3806A>G         | 0.173 | 96  |
| SETBP1 | c.3806A>G         | 0.275 | 97  |
| SETBP1 | c.3806A>G         | 0.269 | 102 |
| SETBP1 | c.3806A>G         | 0.217 | 116 |
| SETBP1 | c.3962G>A         | 0.481 | 44  |
| SETBP1 | c.3962G>A         | 0.46  | 104 |
| SETD2  | c.3422C>T         | 0.463 | 56  |
| SETD2  | c.5666T>C         | 0.438 | 7   |
| SETDB1 | c.2920G>A         | 0.515 | 43  |
| SETDB1 | c.2930C>T         | 0.479 | 32  |
| SOS1   | c.553A>G          | 0.552 | 22  |
| TET2   | c.3703_3704insTTC | 0.433 | 99  |
| TET2   | c.4121G>A         | 0.476 | 45  |
| TET2   | c.4145A>G         | 0.395 | 61  |
| TET2   | c.5103G>T         | 0.448 | 63  |
| TET2   | c.5152G>T         | 0.499 | 26  |
| TET2   | c.5152G>T         | 0.499 | 50  |
| TET2   | c.541_543delATT   | 0.151 | 48  |
| ZRSR2  | c.1147C>G         | 0.539 | 41  |

Table S1B. Variants of uncertain significance. PN: patient number.



**Table S1C. Benign variants**

| Gene    | Variant                 | VAF   | PN  |
|---------|-------------------------|-------|-----|
| ANKRD26 | c.3655G>A               | 0.495 | 101 |
| ANKRD26 | c.3655G>A               | 0.398 | 110 |
| ANKRD26 | c.4445T>C               | 0.466 | 85  |
| ANKRD26 | c.4445T>C               | 0.47  | 116 |
| BCOR    | c.5102T>G               | 0.13  | 5   |
| BCOR    | c.5102T>G               | 0.136 | 60  |
| CEBPa   | c.584_589dupACCCGC      | 0.5   | 7   |
| CEBPa   | c.584_589dupACCCGC      | 1.0   | 11  |
| CEBPa   | c.584_589dupACCCGC      | 0.517 | 12  |
| CEBPa   | c.584_589dupACCCGC      | 0.492 | 13  |
| CEBPa   | c.584_589dupACCCGC      | 0.494 | 29  |
| CEBPa   | c.584_589dupACCCGC      | 0.454 | 37  |
| CEBPa   | c.584_589dupACCCGC      | 0.431 | 65  |
| CEBPa   | c.584_589dupACCCGC      | 0.397 | 99  |
| CEBPa   | c.584_589dupACCCGC      | 0.381 | 102 |
| CNOT3   | c.1414C>T               | 0.536 | 9   |
| CREBBP  | c.1651C>A               | 0.46  | 10  |
| CREBBP  | c.1651C>A               | 0.419 | 35  |
| CSF3R   | c.2197C>A               | 0.47  | 29  |
| GNAS    | c.1376C>G               | 0.391 | 2   |
| KMT2A   | c.89C>G                 | 0.528 | 78  |
| KMT2A   | c.89C>G                 | 0.486 | 91  |
| MAP1B   | c.2386G>A               | 0.491 | 13  |
| NOTCH1  | c.3836G>A               | 0.5   | 26  |
| NOTCH1  | c.4129C>T               | 0.463 | 5   |
| NOTCH1  | c.4129C>T               | 0.502 | 6   |
| NOTCH1  | c.4129C>T               | 0.625 | 42  |
| NOTCH1  | c.4129C>T               | 0.463 | 47  |
| SETBP1  | c.4129G>C               | 0.471 | 12  |
| SETBP1  | c.4129G>C               | 0.486 | 21  |
| SETBP1  | c.4129G>C               | 0.434 | 49  |
| SETBP1  | c.4599_4607delGCCGCCACC | 0.451 | 59  |
| SOS1    | c.2122G>A               | 0.467 | 14  |
| TET2    | c.100C>T                | 0.475 | 8   |
| TET2    | c.100C>T                | 0.474 | 73  |
| TET2    | c.100C>T                | 0.467 | 84  |
| TET2    | c.2599T>C               | 0.528 | 96  |
| TET2    | c.2599T>C               | 0.504 | 104 |
| TET2    | c.5167C>T               | 0.473 | 96  |
| TET2    | c.5167C>T               | 0.476 | 104 |

**Table S1C.** Benign variants. PN: patient number.

Table S2. Germline variants

| PN  | Gene         | Variant                         | VAF   | VAF >0.4 | Control sample | Germline* |
|-----|--------------|---------------------------------|-------|----------|----------------|-----------|
| 1   | <i>CEBPa</i> | c.944_945insCAC                 | 0.392 | No       | -              | No        |
| 1   | <i>CEBPa</i> | c.247delC                       | 0.418 | Yes      | Remission PB   | No        |
| 6   | <i>CEBPa</i> | c.178delA                       | 0.496 | Yes      | Fibroblasts    | No        |
| 7   | <i>RUNX1</i> | c.611G>A                        | 0.221 | No       | -              | No        |
| 8   | <i>RUNX1</i> | c.592G>A                        | 0.363 | No       | -              | No        |
| 9   | <i>TP53</i>  | c.376-2A>G                      | 0.318 | No       | -              | No        |
| 13  | <i>CEBPa</i> | c.622T>C                        | 0.5   | Yes      | Remission PB   | No        |
| 13  | <i>CEBPa</i> | c.659T>C                        | 0.5   | Yes      | Remission PB   | No        |
| 14  | <i>RUNX1</i> | c.367_370dupGATG                | 0.307 | No       | -              | No        |
| 16  | <i>RUNX1</i> | c.926dupG                       | 0.119 | No       | -              | No        |
| 17  | <i>GATA2</i> | c.1186C>T                       | 0.491 | Yes      | Fibroblasts    | Yes       |
| 19  | <i>CEBPa</i> | c.68dupC                        | 0.45  | Yes      | Remission PB   | No        |
| 24  | <i>GATA2</i> | c.913C>G                        | 0.433 | Yes      | Fibroblasts    | No        |
| 26  | <i>CEBPa</i> | c.198_201dupCTAC                | 0.772 | Yes      | Fibroblasts    | No        |
| 40  | <i>TP53</i>  | c.844C>T                        | 0.893 | Yes      | Fibroblasts    | Yes       |
| 42  | <i>TP53</i>  | c.536A>G                        | 0.321 | No       | -              | No        |
| 48  | <i>RUNX1</i> | c.941_942delCT                  | 0.229 | No       | -              | No        |
| 51  | <i>DDX41</i> | c.931C>T                        | 0.517 | Yes      | Not available  | -         |
| 55  | <i>GATA2</i> | c.1187G>A                       | 0.565 | Yes      | Fibroblasts    | Yes       |
| 70  | <i>CEBPa</i> | c.383delC                       | 0.426 | Yes      | Remission PB   | No        |
| 72  | <i>CEBPa</i> | c.59_60insTC                    | 0.478 | Yes      | Remission PB   | No        |
| 73  | <i>RUNX1</i> | c.595G>A                        | 0.219 | No       | -              | No        |
| 82  | <i>RUNX1</i> | c.530_532delTCA                 | 0.209 | No       | -              | No        |
| 84  | <i>TP53</i>  | c.451C>T                        | 0.806 | Yes      | Remission PB   | No        |
| 89  | <i>RUNX1</i> | c.335dupT                       | 0.074 | No       | -              | No        |
| 90  | <i>TP53</i>  | c.376-8_384delTCCTACAGTACTCCCCT | 0.122 | No       | -              | No        |
| 95  | <i>RUNX1</i> | c.602G>A                        | 0.379 | No       | -              | No        |
| 97  | <i>TP53</i>  | c.701A>C                        | 0.091 | No       | -              | No        |
| 103 | <i>ETV6</i>  | c.416_419delCTAT                | 0.077 | No       | -              | No        |
| 103 | <i>TP53</i>  | c.830G>A                        | 0.344 | No       | -              | No        |
| 105 | <i>RUNX1</i> | c.941_942delCT                  | 0.136 | No       | -              | No        |
| 105 | <i>TP53</i>  | c.824G>A                        | 0.17  | No       | -              | No        |
| 108 | <i>TP53</i>  | c.615T>A                        | 0.304 | No       | -              | No        |
| 108 | <i>TP53</i>  | c.427G>A                        | 0.3   | No       | -              | No        |
| 109 | <i>RUNX1</i> | c.305dupT                       | 0.527 | Yes      | Not available  | -         |
| 110 | <i>TP53</i>  | c.1129A>C                       | 0.163 | No       | -              | No        |
| 110 | <i>TP53</i>  | c.743G>A                        | 0.12  | No       | -              | No        |
| 112 | <i>CEBPa</i> | c.971T>G                        | 0.471 | Yes      | Fibroblasts    | No        |
| 112 | <i>CEBPa</i> | c.934_936dupCAG                 | 0.49  | Yes      | Fibroblasts    | No        |
| 112 | <i>GATA2</i> | c.989G>A                        | 0.412 | Yes      | Fibroblasts    | No        |
| 113 | <i>TP53</i>  | c.1129A>C                       | 0.207 | No       | -              | No        |
| 116 | <i>RUNX1</i> | c.958C>T                        | 0.421 | Yes      | Remission PB   | No        |
| 117 | <i>ETV6</i>  | c.306dupT                       | 0.476 | Yes      | Not available  | -         |
| 121 | <i>TP53</i>  | c.470dupT                       | 0.408 | Yes      | Not available  | -         |

**Table S2.** Germline variants. PN: patient number. PB: peripheral blood.

\*Confirmed in control sample.

Table S3

| PN  | Alteration | Detection |                                                                                                                                                       |              |      |
|-----|------------|-----------|-------------------------------------------------------------------------------------------------------------------------------------------------------|--------------|------|
|     |            | NGS       | Karyotype                                                                                                                                             | FISH         | qPCR |
| 9   | del(5)     | Yes       | 45,XY,del(2)(p14), <u>del(5)(q11)</u> , <u>del(7)(q22)</u> , -12, <u>der(17)t(5;17)(q22;p13)[10]</u> / 46,idem,r[cp2] / 46,XY[8]                      | Yes (43%)    | -    |
|     | del(7)     | Yes       |                                                                                                                                                       | Yes (48%)    | -    |
|     | del(17p)   | Yes       |                                                                                                                                                       | Yes (52%)    | -    |
| 12  | inv(16)    | Yes       | 46,XY, <u>inv(16)(p13q22)[18]</u> / 46,XY[2]                                                                                                          | NP           | Yes  |
| 17  | +8         | Yes       | 47,XY,+8[20]                                                                                                                                          | Yes (65%)    | -    |
| 20  | t(10;11)   | Yes       | 47,X,t(Y;15)(q11;p11),+8, <u>inv(12)(q13q15)[19]</u> /46,XY[1]                                                                                        | Yes* (70%)   | Yes  |
|     | +8         | Yes       |                                                                                                                                                       | NP           | -    |
| 46  | del(7)**   | No        | No metaphases                                                                                                                                         | Yes (90%)*** | -    |
| 54  | +8         | No        | 47,XY,+8[7]/46,XY,der(22)t(1;22)(q11;p11)[5]/46,X,der(Y)t(Y;1)(q12;q11)[3]/46,XY,der(13)t(1;13)(q11;p11)[1]/46,XY,der(15)t(1;15)(q11;p11)[1]/46,XY[3] | NP           | -    |
| 65  | del(5)     | Yes       | 46,XY, <u>del(5)(q13q33)[3]</u> /46,XY[17]                                                                                                            | Yes (32%)    | -    |
| 66  | +8         | Yes       | 47,XY,+8,del(12)(p12p13)[1]/47,XY,+8[13]/46,XY[6]                                                                                                     | NP           | -    |
| 68  | del(20q)   | Yes       | 46,XX, <u>del(20)(q12)[3]</u> /46,XX[6]                                                                                                               | NP           | -    |
| 76  | +8         | Yes       | 47,XY,+8[20]                                                                                                                                          | NP           | -    |
| 80  | del(20q)   | Yes       | NP                                                                                                                                                    | Yes (83%)    | -    |
| 82  | +8         | No        | 47,XX,+8[4]/46,XX[6]                                                                                                                                  | NP           | -    |
| 83  | del(7)     | Yes       | 45,XY,inv(3)(q21;q26),-7[15]/45,XY,inv(3)(q21;q26),-7,del(16)(q13)[3]/46,XY[2]                                                                        | NP           | -    |
| 84  | del(5)     | Yes       | 47~48,XY, <u>del(5)(q13q33)</u> , -7, <u>del(20)(q12)</u> ,+mar1,dmin[cp10]/46,XY[4]                                                                  | NP           | -    |
|     | del(7)     | Yes       |                                                                                                                                                       | NP           | -    |
|     | del(20q)   | Yes       |                                                                                                                                                       | NP           | -    |
| 90  | del(5q)    | Yes       | No metaphases                                                                                                                                         | Yes (44%)    | -    |
|     | del(7q)    | Yes       |                                                                                                                                                       | Yes (42%)    | -    |
|     | del(17p)   | Yes       |                                                                                                                                                       | Yes (59%)    | -    |
| 92  | +8         | No        | 50,XY,+8,del(9)(q13),+15,+20,+mar[cp10]/46,XY[1]                                                                                                      | NP           | -    |
| 95  | +8         | No        | 47,XY,+8[3],46,XY[10]                                                                                                                                 | NP           | -    |
| 98  | del(7q)    | Yes       | 46,XY, <u>del(7)(q31)[16]</u> /46,XY[4]                                                                                                               | NP           | -    |
| 102 | +8         | Yes       | 47,XY,+8[7]/46,XY[13]                                                                                                                                 | NP           | -    |
| 105 | del(7)     | Yes       | 45,XX,-7[1]/46,XX,-7,dmin[2]                                                                                                                          | NP           | -    |
| 108 | del(5q)    | Yes       | 43,XX,add(1)(q32),add(5)(p13), <u>del(5)(q15q33)</u> , -7,del(9)(q22),-13,add(14)(p11),-20[17]/46,XX[3]                                               | NP           | -    |
|     | del(7)     | Yes       |                                                                                                                                                       | NP           | -    |
|     | del(20q)   | Yes       |                                                                                                                                                       | NP           | -    |
| 110 | del(5q)    | Yes       | 46,XY, <u>del(5)(q13q33)[3]</u> /47,XY, <u>del(5)(q13q33)</u> ,+21[5]/46,XY[12]                                                                       | NP           | -    |
| 114 | +8         | Yes       | 47,XY,+8[20]                                                                                                                                          | NP           | -    |
| 116 | +8         | No        | 47,XX,+8[2]/46,XX[18]                                                                                                                                 | NP           | -    |
| 119 | t(8;21)    | Yes       | 45,X,-Y,t(8;21)(q22;q22)[8]/46,XY[12]                                                                                                                 | NP           | Yes  |

Table S3. CNV and translocations. PN: patient number. NP: not performed.

\*KMT2A rearrangement break-apart probe. \*\*Low infiltration. \*\*\*Performed in CD34+ isolated cells.

Table S4

| <b>Genes</b>  | <b>Exons</b> | <b>Genes</b>    | <b>Exons</b> |
|---------------|--------------|-----------------|--------------|
| <i>GNB1</i>   | All          | <i>WT1</i>      | 7 & 9        |
| <i>NRAS</i>   | 2 & 3        | <i>PTPN11</i>   | 3 & 13       |
| <i>SETDB1</i> | All          | <i>KRAS</i>     | 2 & 3        |
| <i>RIT1</i>   | All          | <i>LTA4H</i>    | All          |
| <i>FMN2</i>   | All          | <i>FLT3-ITD</i> | 14, 15 & 20  |
| <i>CSF3R</i>  | 14 & 17      | <i>POU4F1</i>   | All          |
| <i>MPL</i>    | 4, 10 & 12   | <i>MAP2K1</i>   | All          |
| <i>SF3B1</i>  | 12 to 16     | <i>AKAP13</i>   | All          |
| <i>IDH1</i>   | 4            | <i>IDH2</i>     | 4            |
| <i>DNMT3A</i> | All          | <i>MAZ</i>      | All          |
| <i>SOS1</i>   | All          | <i>CREBBP</i>   | All          |
| <i>RAF1</i>   | All          | <i>DNAH9</i>    | All          |
| <i>STAG1</i>  | All          | <i>NF1</i>      | All          |
| <i>MYD88</i>  | All          | <i>PPM1D</i>    | All          |
| <i>SETD2</i>  | All          | <i>TP53</i>     | All          |
| <i>TLR9</i>   | All          | <i>SRSF2</i>    | 1            |
| <i>TET2</i>   | All          | <i>SETBP1</i>   | All          |
| <i>HTT</i>    | All          | <i>CALR</i>     | 9            |
| <i>KIT</i>    | 8 & 17       | <i>CEBPA</i>    | All          |
| <i>NPM1</i>   | 12           | <i>POU2F2</i>   | All          |
| <i>MAP1B</i>  | All          | <i>CNOT3</i>    | All          |
| <i>CUX1</i>   | All          | <i>ASXL1</i>    | 12 & 13      |
| <i>BRAF</i>   | All          | <i>GNAS</i>     | All          |
| <i>EZH2</i>   | All          | <i>RUNX1</i>    | 3 to 8       |
| <i>NOTCH1</i> | All          | <i>U2AF1</i>    | 2 & 6        |
| <i>CA9</i>    | All          | <i>STAG2</i>    | All          |
| <i>JAK2</i>   | 12, 14 & 15  | <i>BCORL1</i>   | All          |
| <i>SMC3</i>   | All          | <i>ELF4</i>     | All          |
| <i>SHOC2</i>  | All          | <i>PHF6</i>     | All          |
| <i>KMT2a</i>  | All          | <i>ZRSR2</i>    | All          |
| <i>CBL</i>    | 8 & 9        | <i>BCOR</i>     | All          |

Table S4. Genes included in panel A.

Table S5

| Genes                                 | Exons             | Genes                       | Exons          |
|---------------------------------------|-------------------|-----------------------------|----------------|
| <i>CSF3R</i>                          | 6 to 8 & 14 to 17 | <i>KMT2A</i>                | All            |
| <i>MPL</i>                            | 3 to 6, 10 & 12   | <i>CBL</i>                  | 4, 5 & 8 to 11 |
| <i>NRAS</i>                           | 2 & 3             | <i>ETV6</i>                 | All            |
| <i>DNMT3A</i>                         | 7 to 23           | <i>ETNK1</i>                | 3              |
| <i>SF3B1</i>                          | 12 to 16          | <i>KRAS</i>                 | 2 to 5         |
| <i>IDH1</i>                           | 4                 | <i>PTPN11</i>               | 3, 4 & 13      |
| <i>VHL</i>                            | 2 & 3             | <i>FLT3</i>                 | 14, 15 & 20    |
| <i>GATA2</i>                          | 3 to 7            | <i>IDH2</i>                 | 4              |
| <i>KIT</i>                            | 8 & 17            | <i>TP53</i>                 | 2 to 11        |
| <i>TET2</i>                           | All               | <i>NF1</i>                  | All            |
| <i>NPM1</i>                           | 12                | <i>SRSF2</i>                | 1              |
| <i>DDX41</i>                          | All               | <i>SETBP1</i>               | 4              |
| <i>IKZF1</i>                          | 2 to 8            | <i>EPOR</i>                 | All            |
| <i>EZH2</i>                           | All               | <i>CALR</i>                 | 9              |
| <i>JAK2</i>                           | 8 & 12 to 15      | <i>CEBPa</i>                | 1              |
| <i>ABL1</i>                           | 4 to 11           | <i>ASXL1</i>                | 12 & 13        |
| <i>ANKRD26</i>                        | All               | <i>RUNX1</i>                | 3 to 8         |
| <i>WT1</i>                            | 7 to 9            | <i>ZRSR2</i>                | All            |
| Translocations                        |                   | Deletions                   |                |
| t(9;22)(q34;q11.2)                    |                   | del4q12 ( <i>CHIC2</i> )    |                |
| t(5;var)(q31-q33;var)                 |                   | del 17p13.1 ( <i>TP53</i> ) |                |
| t(8;var)(p11;var)                     |                   | del(7q) [7q11-7q36]         |                |
| t(8;21)(q22;q22)                      |                   | del(5q) [5q12-5q34]         |                |
| t(16;16)(p13.1;q22)//inv(16)(p13;q22) |                   | del(11q)//amp(11q)          |                |
| t(17;var)(q21)                        |                   | del(12p)                    |                |
| t(11;var)(q23;var)                    |                   | del(20q) [q11-qter]         |                |
| t(15;17)(q22;q21)                     |                   | Aneusomies                  |                |
| t(6;9)(p23;q34)                       |                   | +8                          |                |
| t(1;22)(p13;q13)                      |                   | +19                         |                |

Table S5. Genes and alterations included in panel B.

## **Supplementary Information:**

### **Variant Annotation**

Variant transcript annotation was based on all human transcripts obtained from *Ensembl*, Release v81. Only variants located in the coding region and at the splicing sites of canonical isoforms were analyzed. Synonymous variants were excluded from the analysis. *Genecards* and *Uniprot* were used to obtain gene information about areas such as protein function, critical domains, and aliases. Population databases (*GenomAD* and *1000 genomes*) were used to determine the minor allele frequency (MAF) of each variant in order to identify and exclude polymorphisms (variants with MAF greater than 1% in the general population). *In silico* functional analysis was performed (*Mutation taster*, *Polyphen2*, *SIFT*, and *Human Splicing Finder*), and cancer-specific variant databases such as *COSMIC*, *Clinvar*, or *IARC TP53* were also verified. Finally, a thorough literature search was performed to collect data on the variant (eg, functional assays, case-control studies, and reports related to the disease).

### **Custom Onco-Hematology Score**

The ACMG score [19] was modified in order to classify onco-hematologic somatic variants.

Two new features were added as supporting evidence of pathogenicity criterion (PP): VAF and absence in remission sample:

- ✓ VAF of the analyzed variant is considered as pathogenic criterion if it is similar to the VAF of other concomitant variants.

Note: Variants with VAF values close to 0.5 cannot be evaluated (they could be benign variants).

- ✓ Absence of the variant in remission sample indicates somatic origin, and this could be associated with the disease.

Several characteristics were removed from the score since they were limited to pathogenicity evaluation of germline variants:

- ✓ "De novo (both maternity and paternity confirmed) in a patient with the disease and no family history" (Strong evidence of pathogenicity-PS).
- ✓ "For recessive disorders, detected in trans with a pathogenic variant" (Moderate evidence of pathogenicity-PM).
- ✓ "Assumed de novo, but without confirmation of paternity and maternity" (PM).

- ✓ "Cosegregation with disease in multiple affected family members in a gene definitively known to cause the disease" (PP).
- ✓ "Patient's phenotype or family history is highly specific for a disease with a single genetic etiology" (PP).

## Validation

The presence of the variants selected was confirmed by PCR-based specific amplification and Sanger sequencing (*BigDye* v3.1; ABI3130xl or ABI3730xl, *Applied Biosystems*). The detection of internal tandem duplications (ITD) on the *FLT3* gene was validated by fluorescence-based fragment amplification and capillary electrophoresis (ABI3130xl or ABI3730xl, *Applied Biosystems*). Germline or somatic origin was tested in those patients with variants affecting genes associated with inherited myeloid neoplasms (genes underlined in figure 1) presenting a VAF higher than 0.4. The confirmation was performed by variant analysis in fibroblast culture and if not available, in a remission PB sample (Table S2). Cytogenetic alterations were confirmed through qPCR, FISH or/and karyotype. (Table S3).

## Routine methodological approaches in myeloid neoplasm.

AML: *FLT3*-ITD, *NPM1* and *CEBPa* fragment analysis, *RUNX1/RUNX1T1*, *CBFB/MYH11* and *KMT2A/MLLT10* qPCR translocations, karyotype and FISH of *KMT2a* (break apart probe), *inv3/t(3;3)* and *del(17p13)* (Abbott Molecular, USA).

MDS: Karyotype

MPN and MDS/MPN: *JAK2* (V617F and if negative exon 12) for PV; and *JAK2*, *CALR* and *MPL* for PMF and ET were also considered conventional approaches.

In all MN, FISH [*del(5q)*, *-7*, *del(7q)*, *del(20q)* and *+8*] was also treated as conventional method in those patients with no metaphases.

## List of Abbreviations

MN: Myeloid neoplasms

AML: Acute myeloid leukemia

MDS: Myelodysplastic syndrome

MPN: Myeloproliferative neoplasm

MDS/MPN: Myelodysplastic syndrome/myeloproliferative neoplasm

NGS: Next-generation sequencing

CNV: Copy number variants

VUS: Variants of uncertain significance

VAF: Variant allele frequency

PV: Polycythemia vera

PMF: Primary myelofibrosis

ET: Essential thrombocythemia

ITD: Internal tandem duplication

TKD: Tyrosine kinase domain

BM: Bone marrow

PB: Peripheral blood

NOS: Not otherwise specified

Allo-HSCT: Allogeneic hematopoietic stem cell transplant

ACMG: American College of Medical Genetics and Genomics

ELN: European leukemia net

NCCN: National comprehensive cancer network

WHO: World health organization

GIPSS: Genetically inspired prognostic scoring system
